# Supplementary material for: The Blood Concentration of Metallic Nanoparticles Is Related to Cognitive Performance in People with Multiple Sclerosis: An Exploratory Analysis
Source: MDPI journal article supplement (doi:10.3390/biomedicines11071819), 2023-06-25
Supplement: s1 [file s1]

**Table S 1.** Values of individual, clinical, and cognition characteristics, and the study's participants' blood concentration of metallic nanoparticles.

| Al    | Cu   | Cr   | Fe     | Mg    | Ni   | Zn   | Total  | SDMT | MEEM | EDSS | Age | Onset | Relapse<br>Time | Height | Mass  | Sex |
|-------|------|------|--------|-------|------|------|--------|------|------|------|-----|-------|-----------------|--------|-------|-----|
| 4.61  | 0.68 | 0.33 | 332.38 | 29.09 | 0.06 | 3.60 | 370.75 | 59   | 30   | 2.50 | 30  | 112   | 76              | 1.68   | 52.90 | M   |
| 4.85  | 0.54 | 0.33 | 341.12 | 30.22 | 0.04 | 4.29 | 381.39 | 64   | 30   | 1.00 | 26  | 48    | 16              | 1.86   | 87.50 | M   |
| 5.49  | 0.79 | 0.33 | 342.78 | 31.30 | 0.04 | 3.83 | 384.56 | 48   | 29   | 1.00 | 21  | 14    | 14              | 1.70   | 70.60 | F   |
| 6.45  | 0.46 | 0.29 | 295.98 | 24.65 | 0.06 | 3.31 | 331.20 | 59   | 30   | 2.50 | 30  | 112   | 76              | 1.68   | 52.90 | M   |
| 8.36  | 1.02 | 0.33 | 352.98 | 29.66 | 0.08 | 4.20 | 396.63 | 63   | 30   | 1.50 | 27  | 11    | 11              | 1.60   | 55.00 | F   |
| 16.18 | 1.52 | 0.31 | 238.58 | 23.86 | 0.10 | 2.89 | 283.44 | 54   | 29   | 2.50 | 30  | 35    | 35              | 1.58   | 51.10 | F   |
| 7.45  | 0.44 | 0.31 | 294.11 | 23.61 | 0.06 | 3.22 | 329.20 | 36   | 28   | 4.00 | 43  | 56    | 56              | 1.76   | 74.70 | F   |
| 6.29  | 0.93 | 0.57 | 309.82 | 20.03 | 0.21 | 1.73 | 339.58 | 65   | 28   | 1.50 | 18  | 25    | 24              | 1.89   | 93.75 | M   |
| 7.56  | 1.03 | 0.35 | 297.62 | 28.65 | 0.09 | 3.28 | 338.57 | 54   | 29   | 2.00 | 29  | 46    | 43              | 1.68   | 74.40 | M   |
| 7.86  | 1.62 | 0.37 | 296.19 | 41.77 | 0.12 | 3.97 | 351.90 | 35   | 30   | 4.50 | 33  | 26    | 20              | 1.76   | 84.15 | M   |
| 4.39  | 0.58 | 0.33 | 341.95 | 27.29 | 0.04 | 3.83 | 378.41 | 56   | 29   | 1.00 | 27  | 96    | 80              | 1.72   | 69.75 | M   |
| 7.22  | 1.46 | 0.31 | 212.99 | 36.28 | 0.10 | 3.02 | 261.38 | 23   | 29   | 3.00 | 35  | 182   | 94              | 1.58   | 93.70 | F   |
| 8.17  | 0.48 | 0.33 | 311.17 | 28.87 | 0.06 | 3.29 | 352.37 | 49   | 28   | 1.50 | 38  | 235   | 3               | 1.65   | 69.65 | F   |
| 8.80  | 1.10 | 0.33 | 267.70 | 40.29 | 0.10 | 3.64 | 321.96 | 60   | 28   | 4.00 | 41  | 174   | 5               | 1.82   | 94.60 | M   |
| 7.86  | 0.85 | 0.33 | 363.58 | 27.64 | 0.08 | 4.58 | 404.92 | 45   | 30   | 2.00 | 39  | 94    | 60              | 1.59   | 72.50 | F   |
| 6.99  | 1.10 | 0.31 | 190.74 | 33.80 | 0.10 | 2.52 | 235.56 | 45   | 29   | 4.50 | 45  | 156   | 84              | 1.62   | 73.50 | F   |
| 5.46  | 1.20 | 0.54 | 281.22 | 26.29 | 0.58 | 1.96 | 317.25 | 46   | 28   | 4.00 | 23  | 33    | 1               | 1.69   | 93.60 | F   |
| 7.75  | 0.92 | 0.56 | 288.08 | 23.02 | 0.75 | 1.96 | 323.04 | 59   | 29   | 2.50 | 42  | 276   | 60              | 1.77   | 76.45 | M   |
| 8.68  | 1.78 | 0.65 | 304.82 | 23.64 | 1.54 | 3.54 | 344.65 | 52   | 28   | 3.50 | 33  | 65    | 11              | 1.58   | 65.50 | F   |
| 7.53  | 1.08 | 0.45 | 285.80 | 28.22 | 0.55 | 2.91 | 326.55 | 44   | 29   | 3.00 | 37  | 130   | 40              | 1.60   | 90.75 | F   |
| 10.87 | 1.02 | 0.57 | 290.78 | 24.38 | 1.69 | 1.63 | 330.94 | 44   | 30   | 2.00 | 30  | 5     | 5               | 1.55   | 60.00 | F   |

**Note:** Concentrations of metallic elements (Al, Cu, Cr, Fe, Ni, Zn, and Total) in ug/L. SDMT, EDSS, and MMSE in points. Relapse time and onset in months. Age in years. Height in meters. Mass in Kilograms.
